# Supplementary material
Source: PubMed Central journal article supplement (PMC3758689)
Supplement: NIHMS504006-supplement.pdf [file NIHMS504006-supplement.pdf]

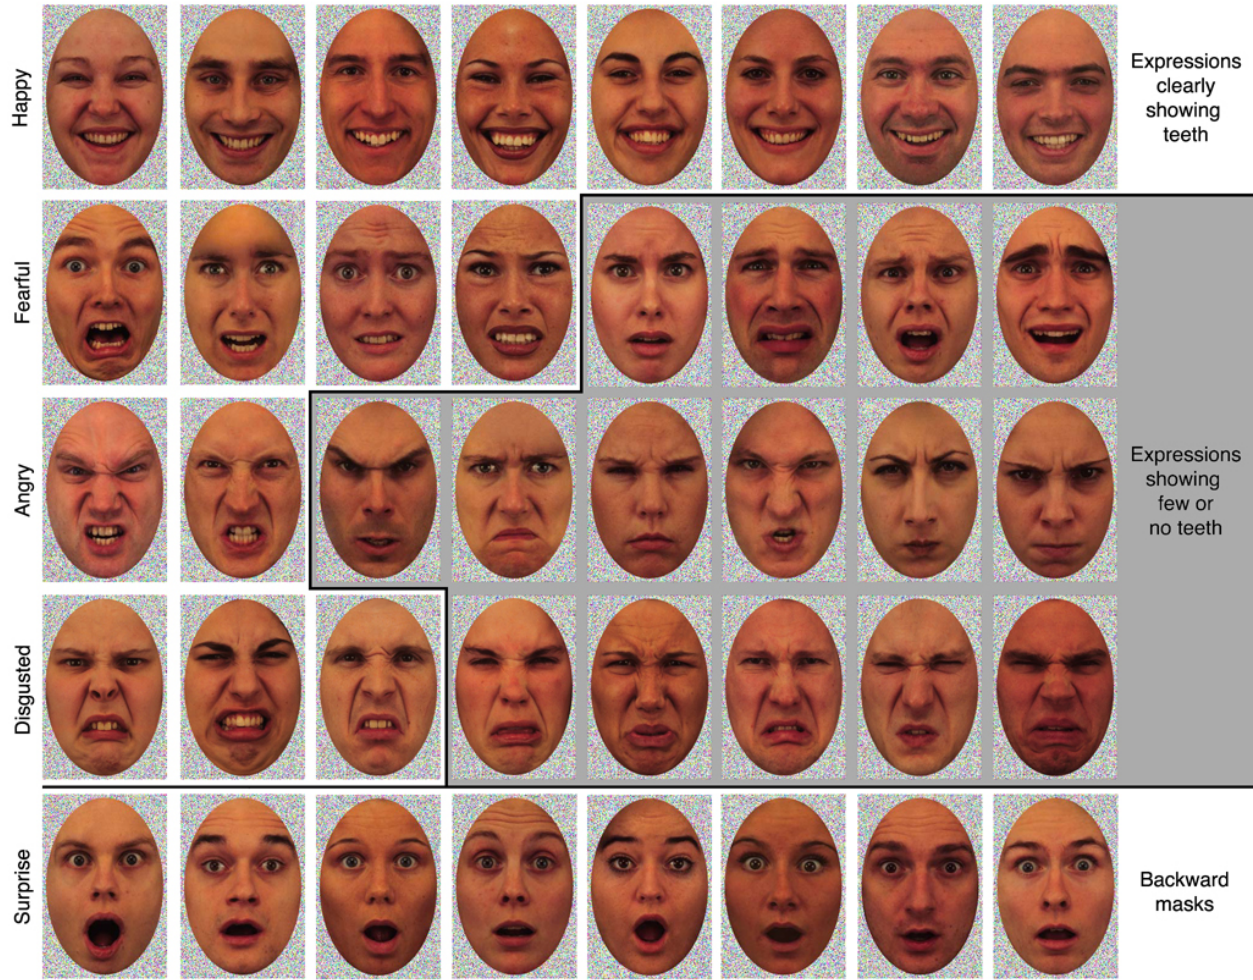

*Supplementary Figure 1.* Faces with happy, fearful, angry, disgusted, and surprised expressions. The experimenter sorted the happy, fearful, angry, and disgusted faces into two groups: those with expressions clearly showing teeth and those with expressions showing few or no teeth.

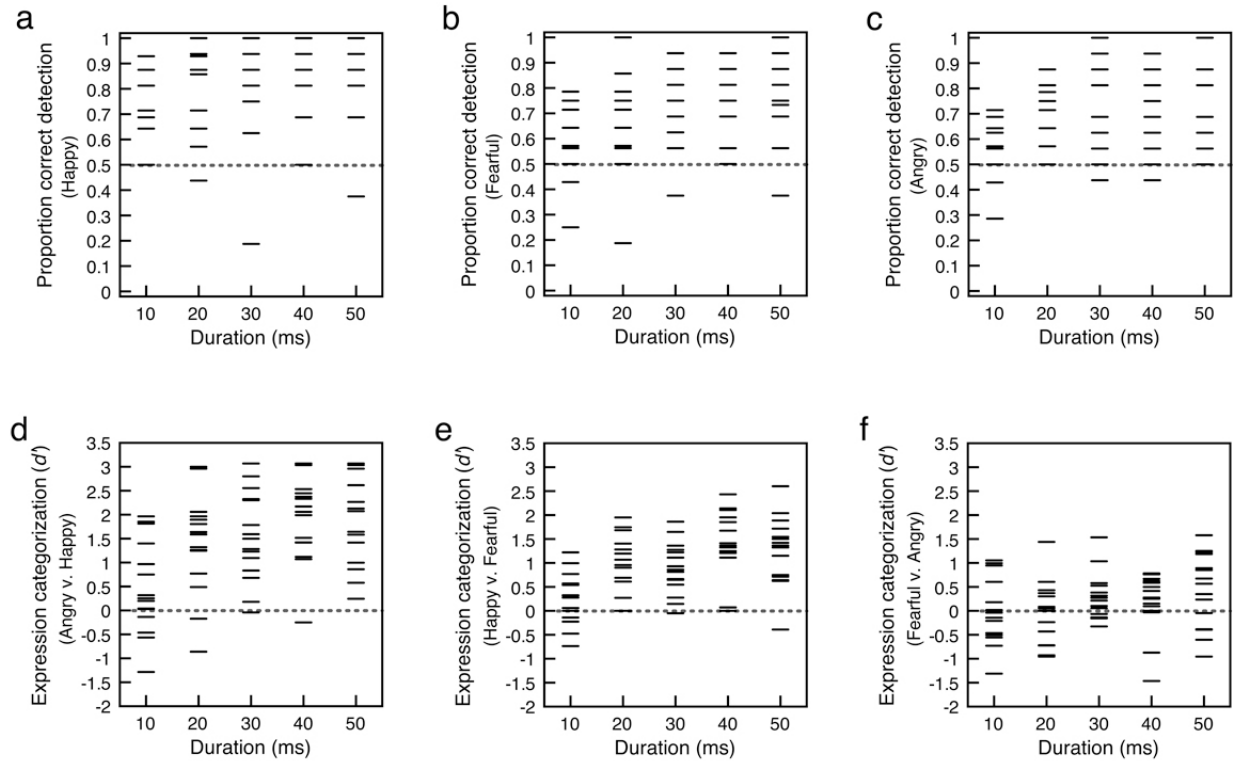

*Supplementary Figure 2.* Emotion detection for all observers with upright (a) happy, (b) fearful, and (c) angry expressions as a function of duration. Categorization sensitivity for all observers between upright (d) angry and happy expressions (e) fearful and happy expressions, and (f) fearful and angry expressions as a function of duration. The dashed lines indicate chance performance. Note that some observers have overlapping scores, which gives the appearance that data might be missing.
